# Supplementary material for: Seroprevalence of SARS-CoV-2 Antibodies in Employees of Three Hospitals of a Secondary Care Hospital Network in Germany and an Associated Fire Brigade: Results of a Repeated Cross-Sectional Surveillance Study Over 1 Year
Source: MDPI journal article supplement (doi:10.3390/ijerph19042402), 2022-02-19
Supplement: s1 [file s1]

**Supplementary Table S1:** Age as risk factor for infection in the different observation periods.

*a: June 2020 – September 2020*

|             | SARS-CoV-2 antibodies |                |             | Statistics       |           |
|-------------|-----------------------|----------------|-------------|------------------|-----------|
|             | all                   | not detectable | detectable  | OR               | p.overall |
|             | <i>n=1231</i>         | <i>n=1217</i>  | <i>n=14</i> |                  |           |
| <b>Age:</b> |                       |                |             |                  | 0.744     |
| 16-25       | 169 (13.7%)           | 167 (13.7%)    | 2 (14.3%)   | Reference        |           |
| 26-40       | 356 (28.9%)           | 351 (28.8%)    | 5 (35.7%)   | 1.19 [0.19;12.6] |           |
| >40 years   | 706 (57.4%)           | 699 (57.4%)    | 7 (50.0%)   | 0.84 [0.16;8.32] |           |

*b: October 2020 – January 2021*

|            | SARS-CoV-2 antibodies |                |              | Statistics       |           |
|------------|-----------------------|----------------|--------------|------------------|-----------|
|            | all                   | not detectable | detectable   | OR               | p.overall |
|            | <i>n=1029</i>         | <i>n=893</i>   | <i>n=136</i> |                  |           |
| <b>Age</b> |                       |                |              |                  | 0.339     |
| 16-25      | 160 (15.5%)           | 136 (15.2%)    | 24 (17.6%)   | Reference        |           |
| 26-40      | 287 (27.9%)           | 244 (27.3%)    | 43 (31.6%)   | 1.00 [0.56;1.80] |           |
| >40 years  | 582 (56.6%)           | 513 (57.4%)    | 69 (50.7%)   | 0.76 [0.45;1.32] |           |

*c: February 2021 – June 2021*

|            | SARS-CoV-2 antibodies |                |              | Statistics       |           |
|------------|-----------------------|----------------|--------------|------------------|-----------|
|            | all                   | not detectable | detectable   | OR               | p.overall |
|            | <i>n=714</i>          | <i>n=505</i>   | <i>n=209</i> |                  |           |
| <b>Age</b> |                       |                |              |                  | 0.052     |
| 16-25      | 110 (15.4%)           | 69 (13.7%)     | 41 (19.6%)   | Reference        |           |
| 26-40      | 204 (28.6%)           | 140 (27.7%)    | 64 (30.6%)   | 0.77 [0.46;1.29] |           |
| >40 years  | 400 (56.0%)           | 296 (58.6%)    | 104 (49.8%)  | 0.59 [0.37;0.95] |           |

**Note:** date of birth is missing in 16 employees

**Supplementary Table S2:** Profession and institution as risk factor for infection.

| Variable          | SARS-CoV-2 antibodies |                              |                   |                              |                  |                                            |                  | Statistics        |         |
|-------------------|-----------------------|------------------------------|-------------------|------------------------------|------------------|--------------------------------------------|------------------|-------------------|---------|
|                   | all                   | St. Vincenz Hospital Datteln |                   | St. Laurentius Stift Waltrop |                  | Vestische Kinder- und Jugendklinik Datteln |                  | OR (95% CI)       | p-value |
|                   | n=1699                | not detected<br>n=725        | detected<br>n=133 | not detected<br>n=260        | detected<br>n=59 | not detected<br>n=487                      | detected<br>n=35 |                   |         |
| <b>profession</b> |                       |                              |                   |                              |                  |                                            |                  |                   |         |
| others*           | 297 (17.5%)           | 157 (21.7%)                  | 18 (13.5%)        | 69 (26.5%)                   | 13 (22.0%)       | 40 (8.21%)                                 | 0 (0.0%)         | Reference         |         |
| nurse             | 906 (53.3%)           | 381 (52.6%)                  | 77 (57.9%)        | 121 (46.5%)                  | 25 (42.4%)       | 280 (57.5%)                                | 22 (62.9%)       | 1.64 [1.09; 2.55] | 0.021   |
| MD                | 215 (12.7%)           | 79 (10.9%)                   | 15 (11.3%)        | 29 (11.2%)                   | 6 (10.2%)        | 79 (16.2%)                                 | 7 (20.0%)        | 1.64 [0.94; 2.85] | 0.080   |
| care worker       | 197 (11.6%)           | 93 (12.8%)                   | 21 (15.8%)        | 16 (6.15%)                   | 8 (13.6%)        | 55 (11.3%)                                 | 4 (11.4%)        | 2.07 [1.21; 3.54] | 0.007   |
| therapist         | 84 (4.9%)             | 15 (2.1%)                    | 2 (1.5%)          | 25 (9.6%)                    | 7 (11.9%)        | 33 (6.8%)                                  | 2 (5.7%)         | 1.55 [0.71; 3.21] | 0.250   |

**Note:** \* employees working in kitchen, administration, cleaning service and other professions with no contact to patients
